# Supplementary material
Source: PubMed Central journal article supplement (PMC4771841)
Supplement: NIHMS760969-supplement-supplement_1.pdf [file NIHMS760969-supplement-supplement_1.pdf]

## Supplementary Figure Legends

Supplementary Figure 1. Homozygosity plot for Family-1455. Red bars represent stretches of homozygosity in the genome above the threshold of 5 cM. X-axis: chromosomal position. Y-axis: degree of homozygosity. Arrow points to homozygous interval containing the *NSUN2* gene.

Supplementary Figure 2. Aberrant splicing of *NSUN2* in Family-1455. (A) Sequence chromatogram in control (wt) and mother from 210 bp product compared with 250 bp product from two affected members. Annotation shows splicing from exon 5 to the AluY to Exon 7 accounts for the 250 bp mutant transcript product. (B) Schematic of aberrant splicing in the affected individuals.

Supplementary Figure 3. Predicted *NSUN2* open reading frame (ORF) for control and affected. Blue: Exon 6; Red: 3' AluY arm.

Supplementary Figure 1

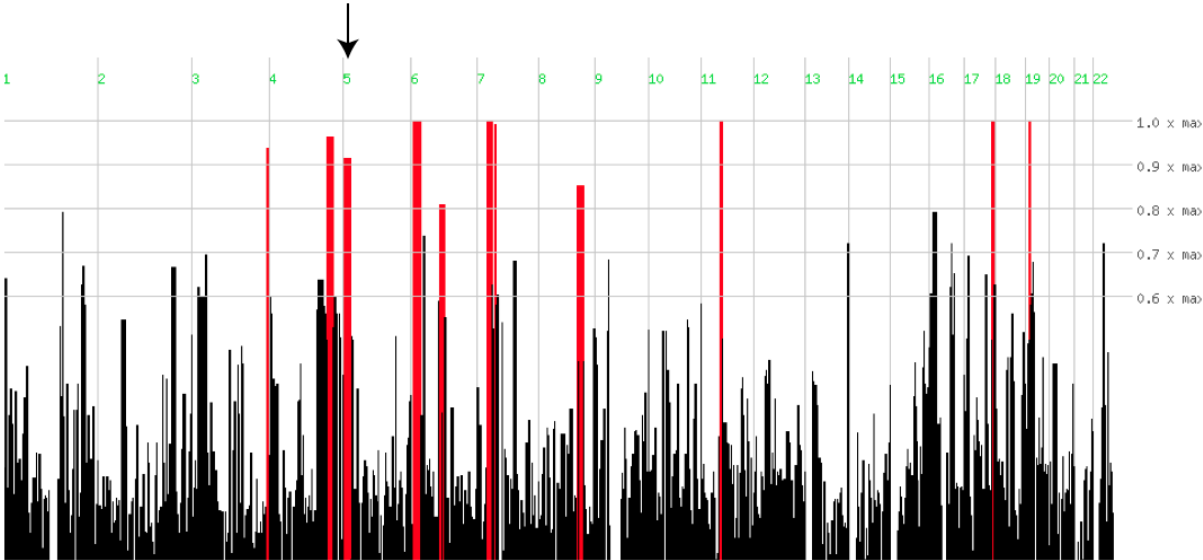

Supplementary Figure 2

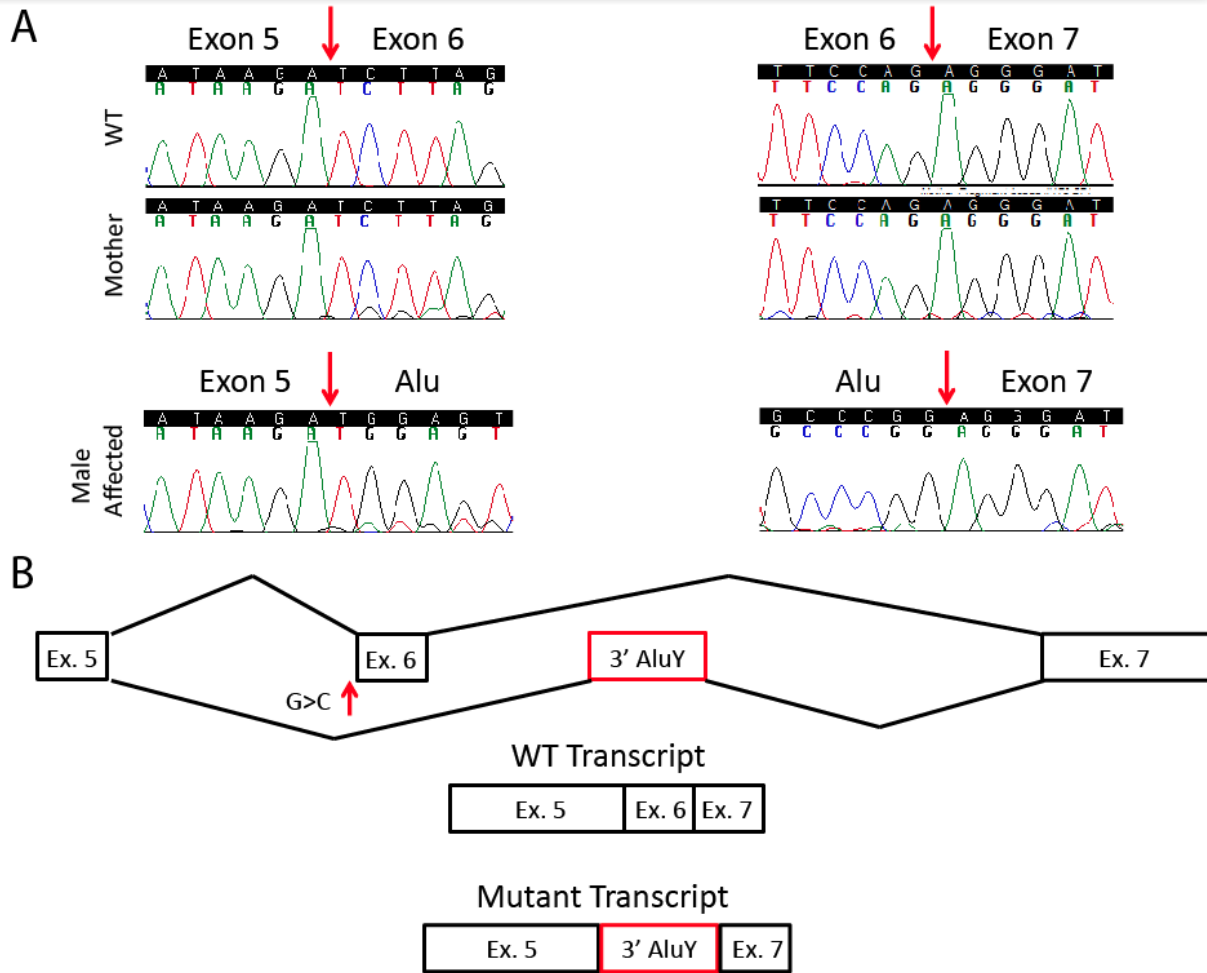

### Supplemental Fig. 3

Wildtype ORF

ATGGGGCGGCGGTTCGCGGGGTTCGGCGGCTCCAGCAACAGCAGCGGCCGGAGGACGCGGAGGATGGCGCCG  
AGGGTGGTGGAAAGCGCGGCGAGGCGGGCTGGGAAGGAGGCTACCCCGAGATCGTCAAGGAGAACAAGCT  
GTTTCGAGCACTACTACCAGGAGCTCAAGATCGTGCCCGAGGGCGAGTGGGGCCAGTTCATGGACGCTCTC  
AGGGAGCCGCTCCCGGCCACTTTAAGAATTACTGGTTACAAAAGCCACGCAAAAAGAGATTCTCCATTGCT  
TAAAGAACAAATATTTTTAAGGAATTGGAGGACCTGGAGGTGGACGGTCAGAAAAGTTGAAGTTCCACAGCC  
ACTGAGTTGGTATCCTGAAGAACTTGCCTGGCACACAAATTTAAGTCGAAAAATCTTGAGAAAAATCGCCA  
CACTTGAAAAGTTTCATCAGTTTCTAGTTAGTGAAACAGAATCTGGAAATATTAGTCGTCAAGAAGCTG  
TTAGCATGATCCCACCACTGCTCCTCAACGTGCGGCCTCATCATAAG

ATCTTAGATATGTGTGCAGCACCTGGCTCAAAGACCACACAGTTAATTGAAATGCTACATGCCGACATGA  
ATGTCCCCTTTCCAG

AGGGATTTGTTATTGCGAATGATGTGGACAACAAGCGCTGCTACCTGCTCGTCCATCAAGCCAAGAGGCT  
GAGCAGCCCCTGCATCATGGTGGTCAACCATGATGCCTCCAGCATACCCAGGCTCCAGATAGATGTGGAC  
GGCAGGAAAGAGATCCTCTTCTATGATCGAATTTTATGTGATGTCCCTTGCAGTGGAGACGGCACTATGA  
GAAAAACATTGATGTTTGGAAAAAGTGGACCACCTTAAATAGCTTGCAGCTACATGGCTTACAGCTGCG  
GATTGCAACACGCGGGGCTGAACAGCTGGCTGAAGGTGGAAGGATGGTGTATTCCACGTGTTCACTAAAC  
CCTATTGAGGATGAAGCAGTCATAGCATCTTTACTGGAAAAAGTGAAGGTGCTTTGGAGCTTGTGATG  
TGTCTAATGAACTGCCAGGGCTGAAGTGGATGCCTGGAATCACACAGTGGAAAGGTAATGACGAAAGATGG  
GCAGTGGTTTACAGACTGGGACGCTGTTCCCTCACAGCAGACACACCCAGATCCGACCTACCATGTTCCCT  
CCGAAGGACCCAGAAAAGCTGCAGGCCATGCACCTGGAGCGATGCCTTAGGATATTACCCCATCATCAGA  
ATACTGGAGGGTTTTTTGTGGCAGTATTGGTAAAAAATCTTCAATGCCGTGGAATAAACGTCAGCCAAA  
GCTTCAGGGTAAATCTGCAGAGACCAGAGAAAGCACACAGCTGAGCCCTGCAGATCTCACAGAAAGGAAA  
CCCACAGATCCCTCTAAGCTGGAAAGTCCGTCAATCACAGGAAGTGGTGACACAGAAATAGCTCATGCAA  
CTGAGGATTTAGAGAATAATGGCAGTAAGAAAGATGGCGTGTGTGGTCCCTCCATCAAAGAAAATGAA  
GTTATTTGGATTTAAAGAAGATCCATTTGTATTTATTCCTGAAGATGACCCATTATTTCCACCTATTGAG  
AAATTTTATGCTTTGGATCCTTCATTCCCAAGGATGAATTTGTTAACTCGGACTACAGAAGGGAAGAAAA  
GGCAGCTCTACATGGTTTCTAAGGAGTTGCGGAATGTGCTGCTGAATAACAGTGAGAAGATGAAGTTAT  
TAACACGGGGATCAAAGTCTGGTGTAGAAATAACAGCGGTGAAGAGTTTACTGTGCTTTCCGGCTGGCA  
CAGGAGGGAATATATACATTGTATCCATTTATTAACCAAGAATTATTACTGTATCAATGGAAGATGTTA  
AGATACTGTTGACCCAGGAAAATCCCTTTTTTAGAAAACCTCAGCAGTGAGACCTACAGTCAAGCAAAGGA  
CCTGGCAAAGGGAAGCATCGTGCTGAAGTATGAACCAGATTCTGCGAATCCAGACGCTCTGCAGTGTCCC  
ATCGTCTTATGCGGATGGCGGGGAAAGGCCTCCATTCGAACTTTTGTGCCCAAGAATGAACGGCTTCATT  
ATCTCAGGATGATGGGGCTGGAGGTATTGGGAGAAAAGAAGAAGGAAGGGGTATCCTCACAAATGAGAG  
TGCAGCCAGCACCCGACAGCCAGACAATGACGTGACTGAGGGACAGAGAGCAGGAGAGCCCAACAGCCCA  
GATGCAGAAGAGGCCAACAGTCCAGACGTGACAGCAGGCTGTGACCCGGCGGGGTCCATCCACCCCGGT  
GA

Mutant ORF

ATGGGGCGGCGGTTCGCGGGGTTCGGCGGCTCCAGCAACAGCAGCGGCCGGAGGACGCGGAGGATGGCGCCG  
AGGGTGGTGGAAAGCGCGGCGAGGCGGGCTGGGAAGGAGGCTACCCCGAGATCGTCAAGGAGAACAAGCT

GTTCGAGCACTACTACCAGGAGCTCAAGATCGTGCCCGAGGGCGAGTGGGGCCAGTTCATGGACGCTCTC  
AGGGAGCCGCTCCCGGCCACTTTAAGAATTAAGTTACAAAAGCCACGCAAAAAGAGATTCTCCATTGCT  
TAAAGAACAAATATTTTAAGGAATTGGAGGACCTGGAGGTGGACGGTCAGAAAAGTTGAAGTTCCACAGCC  
ACTGAGTTGGTATCCTGAAGAAGTTGCCTGGCACAACAATTTAAGTCGAAAAATCTTGAGAAAAATCGCCA  
CACTTGGAAAAGTTTCATCAGTTTCTAGTTAGTGAAACAGAATCTGGAAATATTAGTCGTCAAGAAGCTG  
TTAGCATGATCCCACCACTGCTCCTCAACGTGCGGCCTCATCATAAG

ATGGAGTCTCACTCTGTTGCCAGGCTGGAGTGCAGTGGCGTGATGTTGGCTCACTGCAAGTTCCACCTC  
CTGGGTTACGCCATTCTCCTGCCTCAGCCTCTCGAGTAGCTGGGACTACAGGTGCCCGCCACCATGCC  
GG

AGGGATTTGTTATTGCGAATGATGTGGACAACAAGCGCTGCTACCTGCTCGTCCATCAAGCCAAGAGGCT  
GAGCAGCCCCTGCATCATGGTGGTCAACCATGATGCCTCCAGCATACCCAGGCTCCAGATAGATGTGGAC  
GGCAGGAAAGAGATCCTCTTCTATGATCGAATTTTATGTGATGTCCCTTGCAGTGGAGACGGCACTATGA  
GAAAAACATTGATGTTTGGAAAAAGTGGACCACCTTAAATAGCTTGCAGCTACATGGCTTACAGCTGCG  
GATTGCAACACGCGGGGCTGAACAGCTGGCTGAAGGTGGAAGGATGGTGTATTCCACGTGTTCACTAAAC  
CCTATTGAGGATGAAGCAGTCATAGCATCTTTACTGGAAAAAGTGAAGGTGCTTTGGAGCTTGCTGATG  
TGTCTAATGAACTGCCAGGGCTGAAGTGGATGCCTGGAATCACACAGTGGAAAGGTAATGACGAAAGATGG  
GCAGTGGTTTACAGACTGGGACGCTGTTCCCTCACAGCAGACACACCCAGATCCGACCTACCATGTTCCCT  
CCGAAGGACCCAGAAAAGCTGCAGGCCATGCACCTGGAGCGATGCCTTAGGATATTACCCCATCATCAGA  
ATACTGGAGGGTTTTTTTGTGGCAGTATTGGTGA AAAAATCTTCAATGCCGTGGAATAAACGT CAGCCAAA  
GCTTCAGGGTAAATCTGCAGAGACCAGAGAAAGCACACAGCTGAGCCCTGCAGATCTCACAGAAGGGAAA  
CCCACAGATCCCTCTAAGCTGGAAAGTCCGTCATTACAGGAAGTGGTGACACAGAAATAGCTCATGCAA  
CTGAGGATTTAGAGAATAATGGCAGTAAGAAAGATGGCGTGTGTGGTCCCTCCATCAAAGAAAATGAA  
GTTATTTGGATTTAAAGAAGATCCATTTGTATTTATTCCTGAAGATGACCCATTATTTCCACCTATTGAG  
AAATTTTATGCTTTGGATCCTTCATTCCCAAGGATGAATTTGTTAACTCGGACTACAGAAGGGAAGAAAA  
GGCAGCTCTACATGGTTTCTAAGGAGTTGCGGAATGTGCTGCTGAATAACAGTGAGAAGATGAAGGTTAT  
TAACACGGGGATCAAAGTCTGGTGTAGAAATAACAGCGGTGAAGAGTTTGACTGTGCTTTCCGGCTGGCA  
CAGGAGGGAATATATACATTGTATCCATTTATTA ACTCAAGAATTATTACTGTATCAATGGAAGATGTTA  
AGATACTGTTGACCCAGGAAAATCCCTTTTTTAGAAA ACTCAGCAGTGAGACCTACAGTCAAGCAAAGGA  
CCTGGCAAAGGGAAGCATCGTGCTGAAGTATGAACCAGATTCTGCGAATCCAGACGCTCTGCAGTGTCCC  
ATCGTCTTATGCGGATGGCGGGGAAAGGCCTCCATTCGAACTTTGTGCCCAAGAATGAA CGGCTTCATT  
ATCTCAGGATGATGGGGCTGGAGGTATTGGGAGAAAAGAAGAAGGAAGGGGTTATCCTCACAAATGAGAG  
TGCAGCCAGCACCCGACAGCCAGACAATGACGTGACTGAGGGACAGAGAGCAGGAGAGCCCAACAGCCCA  
GATGCAGAAGAGGCCAACAGTCCAGACGTGACAGCAGGCTGTGACCCGGCGGGGGTCCATCCACCCCGGT  
GA
